# Supplementary material for: Sulfate radical oxidation combined with iron flocculation for upgrading biological effluent of coking wastewater
Source: Royal Society of Chemistry journal article supplement (doi:10.1039/c8ra08134d), 2018-01-01
Supplement: c8ra08134d1.pdf [file c8ra08134d1.pdf]

## Supporting information for

### Sulfate radical oxidation combined iron flocculation towards up-grading of biological effluent of coking wastewater

Zhichun Zhang <sup>a, b</sup>, Xiuping Yue <sup>a\*</sup>, Yanqing Duan <sup>a</sup>, Xiao Zhang <sup>a</sup>, Yanjuan Gao <sup>a</sup>,  
Rao Zhu <sup>c</sup>, Xia Cui <sup>d</sup>

\*Corresponding author. [yuxiuping@tyut.edu.cn](mailto:yuxiuping@tyut.edu.cn) (X. Yue)

#### Contents

Supporting table (Table S1, S2, S3)

## Supporting tables

Table S1. Characteristics of phenolic compounds

| name        | Molecular formula | structure                                                                         | Pseudo first-order reaction rate constant | Reference |
|-------------|-------------------|-----------------------------------------------------------------------------------|-------------------------------------------|-----------|
| Bisphenol A | $C_{15}H_{16}O_2$ | 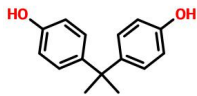 | $0.025\text{min}^{-1a}$                   | 1         |
| Phenol      | $C_6H_6O$         |  | $1.2 \times 10^{-3}\text{h}^{-1b}$        | 2         |

<sup>a</sup>, the molar ratio of oxidant to bisphenol was 3/1;

<sup>b</sup>, the molar ratio of oxidant to phenol was 42/1.

Table S2 Chloride ion concentration in EBCW

| Operating time<br>(minute)                          | 0      | 5      | 10     | 15     | 25    | 35     |
|-----------------------------------------------------|--------|--------|--------|--------|-------|--------|
| Chloride ion concentration<br>(mg•L <sup>-1</sup> ) | 4.7250 | 4.5660 | 4.9230 | 4.7090 | 5.011 | 4.8200 |

Table S3 chromogenic compounds in EBCW

| name            | Molecular formula       | structure                                                                         | Pseudo first-order reaction rate constant | Reference |
|-----------------|-------------------------|-----------------------------------------------------------------------------------|-------------------------------------------|-----------|
| Methylene Blue  | $C_{16}H_{18}ClN_3S$    | 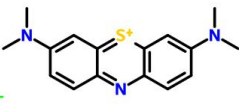 | $14.8 \times 10^{-2} \text{min}^{-1a}$    | 3         |
| Disperse Blue 3 | $C_{17}H_{16}N_2O_3$    |  | $2.19 \times 10^{-2} \text{min}^{-1b}$    | 4         |
| Acid orange 7   | $C_{16}H_{11}N_2NaO_4S$ |  | $17.5 \times 10^{-2} \text{min}^{-1c}$    | 5         |

<sup>a</sup>, the molar ratio of oxidant to Methylene Blue was 640/1;

<sup>b</sup>, the molar ratio of oxidant to Rhodamine B was 600/1;

<sup>c</sup>, the molar ratio of oxidant to Acid Angelico 7 was 10/1.

1. J. Sharma, I. M. Mishra, D. D. Dionysiou and V. Kumar, *Chemical Engineering Journal*, 2015, **276**, 193-204.
2. M. A. Lominchar, S. Rodríguez, D. Lorenzo, N. Santos, A. Romero and A. Santos, *Environmental Technology*, 2017, **39**, 1.
3. A. Ghauch, A. M. Tuqan, N. Kibbi and S. Geryes, *Chemical Engineering Journal*, 2012, **213**, 259-271.
4. J. E. Silveira, A. L. Garcia-Costa, T. O. Cardoso, J. A. Zazo and J. A. Casas, *Electrochimica Acta*, 2017, **258**.
5. S. Yang, P. Wang, X. Yang, L. Shan, W. Zhang, X. Shao and R. Niu, *Journal of Hazardous Materials*, 2010, **179**, 552-558.
